# Supplementary material
Source: publisher figshare collection journal article supplement (https://rs.figshare.com/ndownloader/files/13512092)
Supplement: Supplementary file 1 [file 13512092]

**Table S3.** Extension of the Spanish river network and of each river typology not salinised and salinised, including the degree of salinisation (slight, moderate, heavy and extreme).

| **River typology** | **Degree of salinisation** | **River length* (km)** | **% River length*** |
| --- | --- | --- | --- |
| Rivers in Tajo and Guadiana siliceous plains | Not salinised | 631.095 | 19.608 |
| Slightly salinised | 1782.849 | 55.393 |
| Moderately salinised | 587.212 | 18.245 |
| Heavily salinised | 183.560 | 5.703 |
| Extremely salinised | 33.810 | 1.050 |
| Mineralised rivers in the Northern Plateau | Not salinised | 1196.302 | 38.201 |
| Slightly salinised | 899.907 | 28.736 |
| Moderately salinised | 988.725 | 31.572 |
| Heavily salinised | 42.590 | 1.360 |
| Extremely salinised | 4.097 | 0.131 |
| Manchegan rivers | Not salinised | 336.620 | 19.492 |
| Slightly salinised | 718.683 | 41.616 |
| Moderately salinised | 498.754 | 28.881 |
| Heavily salinised | 145.621 | 8.432 |
| Extremely salinised | 27.265 | 1.579 |
| Siliceous rivers in Sierra Morena piedmont | Not salinised | 328.496 | 30.057 |
| Slightly salinised | 496.824 | 45.458 |
| Moderately salinised | 225.241 | 20.609 |
| Heavily salinised | 35.796 | 3.275 |
| Extremely salinised | 6.567 | 0.601 |
| Low altitude mineralised Mediterranean rivers | Not salinised | 839.477 | 58.969 |
| Slightly salinised | 364.730 | 25.621 |
| Moderately salinised | 155.188 | 10.901 |
| Heavily salinised | 55.887 | 3.926 |
| Extremely salinised | 8.303 | 0.583 |
| Rivers of low siliceous Mediterranean mountain | Not salinised | 3671.681 | 69.226 |
| Slightly salinised | 1199.200 | 22.610 |
| Moderately salinised | 355.609 | 6.705 |
| Heavily salinised | 63.372 | 1.195 |
| Extremely salinised | 14.037 | 0.265 |
| Mineralised rivers of low Mediterranean mountain | Not salinised | 6171.847 | 68.907 |
| Slightly salinised | 2078.893 | 23.210 |
| Moderately salinised | 540.486 | 6.034 |
| Heavily salinised | 151.601 | 1.693 |
| Extremely salinised | 13.914 | 0.155 |
| Mediterranean rivers with karstic influence | Not salinised | 277.075 | 99.618 |
| Slightly salinised | 1.063 | 0.382 |
| Moderately salinised | 0.000 | 0.000 |
| Heavily salinised | 0.000 | 0.000 |
| Extremely salinised | 0.000 | 0.000 |
| Siliceous Mediterranean mountain rivers | Not salinised | 2046.892 | 65.881 |
| Slightly salinised | 979.892 | 31.539 |
| Moderately salinised | 55.376 | 1.782 |
| Heavily salinised | 12.803 | 0.412 |
| Extremely salinised | 12.005 | 0.386 |
| Calcareous Mediterranean mountain river | Not salinised | 8726.433 | 87.431 |
| Slightly salinised | 951.734 | 9.536 |
| Moderately salinised | 258.193 | 2.587 |
| Heavily salinised | 36.618 | 0.367 |
| Extremely salinised | 7.978 | 0.080 |
| Heavily mineralised Mediterranean rivers | Not salinised | 948.703 | 100.000 |
| Slightly salinised | 0.000 | 0.000 |
| Moderately salinised | 0.000 | 0.000 |
| Heavily salinised | 0.000 | 0.000 |
| Extremely salinised | 0.000 | 0.000 |
| Low altitude Mediterranean river axes | Not salinised | 187.412 | 33.298 |
| Slightly salinised | 364.730 | 25.621 |
| Moderately salinised | 155.188 | 10.901 |
| Heavily salinised | 55.887 | 3.926 |
| Extremely salinised | 8.303 | 0.583 |
| Poorly mineralised continental Mediterranean river axes | Not salinised | 2565.115 | 99.331 |
| Slightly salinised | 7.461 | 1.914 |
| Moderately salinised | 3.053 | 0.783 |
| Heavily salinised | 0.000 | 0.000 |
| Extremely salinised | 5.032 | 1.291 |
| Mineralised continental Mediterranean river axes | Not salinised | 1297.198 | 79.333 |
| Slightly salinised | 253.111 | 15.479 |
| Moderately salinised | 67.433 | 4.124 |
| Heavily salinised | 14.374 | 0.879 |
| Extremely salinised | 3.023 | 0.185 |
| Large Mediterranean river axes | Not salinised | 1325.513 | 86.499 |
| Slightly salinised | 122.973 | 8.025 |
| Moderately salinised | 33.091 | 2.159 |
| Heavily salinised | 44.852 | 2.927 |
| Extremely salinised | 5.970 | 0.390 |
| Coastal Mediterranean rivers | Not salinised | 777.001 | 73.928 |
| Slightly salinised | 169.972 | 16.172 |
| Moderately salinised | 64.160 | 6.105 |
| Heavily salinised | 35.847 | 3.411 |
| Extremely salinised | 4.047 | 0.385 |
| Rivers in humid Baetic highlands | Not salinised | 374.206 | 96.011 |
| Slightly salinised | 7.461 | 1.914 |
| Moderately salinised | 3.053 | 0.783 |
| Heavily salinised | 0.000 | 0.000 |
| Extremely salinised | 5.032 | 1.291 |
| Siliceous Cantabric-Atlantic rivers | Not salinised | 2863.055 | 80.808 |
| Slightly salinised | 546.143 | 15.415 |
| Moderately salinised | 95.574 | 2.698 |
| Heavily salinised | 22.593 | 0.638 |
| Extremely salinised | 15.663 | 0.442 |
| Calcareous Cantabric-Atlantic rivers | Not salinised | 668.116 | 78.539 |
| Slightly salinised | 119.162 | 14.008 |
| Moderately salinised | 46.102 | 5.419 |
| Heavily salinised | 14.455 | 1.699 |
| Extremely salinised | 2.844 | 0.334 |
| Basque-Pyrenaic rivers | Not salinised | 358.901 | 84.230 |
| Slightly salinised | 49.516 | 11.621 |
| Moderately salinised | 13.675 | 3.209 |
| Heavily salinised | 3.003 | 0.705 |
| Extremely salinised | 0.999 | 0.235 |
| Gredos-Béjar Georges | Not salinised | 107.370 | 17.484 |
| Slightly salinised | 293.244 | 47.750 |
| Moderately salinised | 163.695 | 26.655 |
| Heavily salinised | 38.184 | 6.218 |
| Extremely salinised | 11.626 | 1.893 |
| Humid siliceous mountain rivers | Not salinised | 2362.651 | 93.936 |
| Slightly salinised | 107.960 | 4.292 |
| Moderately salinised | 32.554 | 1.294 |
| Heavily salinised | 7.883 | 0.313 |
| Extremely salinised | 4.115 | 0.164 |
| Humid calcareous mountain rivers | Not salinised | 2838.839 | 90.792 |
| Slightly salinised | 214.996 | 6.876 |
| Moderately salinised | 42.959 | 1.374 |
| Heavily salinised | 17.158 | 0.549 |
| Extremely salinised | 12.794 | 0.409 |
| High mountain rivers | Not salinised | 1635.143 | 92.125 |
| Slightly salinised | 108.907 | 6.136 |
| Moderately salinised | 17.781 | 1.002 |
| Heavily salinised | 9.225 | 0.520 |
| Extremely salinised | 3.867 | 0.218 |
| Main siliceous Cantabric-Atlantic river axes | Not salinised | 487.988 | 76.488 |
| Slightly salinised | 135.774 | 21.282 |
| Moderately salinised | 10.988 | 1.722 |
| Heavily salinised | 2.206 | 0.346 |
| Extremely salinised | 1.033 | 0.162 |
| Main calcareous Cantabric-Atlantic river axes | Not salinised | 132.947 | 56.786 |
| Slightly salinised | 62.669 | 26.768 |
| Moderately salinised | 28.085 | 11.996 |
| Heavily salinised | 7.610 | 3.251 |
| Extremely salinised | 2.806 | 1.199 |
| Coastal Cantabric - Atlantic rivers | Not salinised | 721.679 | 91.913 |
| Slightly salinised | 32.812 | 4.179 |
| Moderately salinised | 11.564 | 1.473 |
| Heavily salinised | 11.936 | 1.520 |
| Extremely salinised | 7.187 | 0.915 |
| Small siliceous Cantabric - Atlantic river axes | Not salinised | 2253.943 | 92.793 |
| Slightly salinised | 111.807 | 4.603 |
| Moderately salinised | 23.935 | 0.985 |
| Heavily salinised | 32.396 | 1.334 |
| Extremely salinised | 6.916 | 0.285 |
| Small calcareous Cantabric-Atlantic river axes | Not salinised | 613.492 | 86.650 |
| Slightly salinised | 89.210 | 12.600 |
| Moderately salinised | 3.109 | 0.439 |
| Heavily salinised | 1.104 | 0.156 |
| Extremely salinised | 1.098 | 0.155 |

*Length of the Spanish river network used in the study
